# Supplementary material for: Lead (Pb) exposure reduces global DNA methylation level by non-competitive inhibition and alteration of dnmt expression
Source: Royal Society of Chemistry journal article supplement (doi:10.1039/c6mt00198j), 2016-12-02
Supplement: c6mt00198j1.pdf [file c6mt00198j1.pdf]

## Supplementary Material

### Lead (Pb) exposure reduces global DNA methylation level by non-competitive inhibition and alteration of *dnmt* expression

Oscar Sanchez<sup>1</sup>, Jinyoung Lee<sup>2</sup>, Nathaphon Yu King Hing<sup>1</sup>, Seong-Eun Kim<sup>1</sup>, Jennifer L. Freeman<sup>2\*</sup>, Chongli Yuan<sup>1\*</sup>

#### 1. Supplementary Tables

**Table S1.** Sequence of DNA fragment used for the evaluation of the methyltransferase activity of *M.Sss I*.

#### 2. Supplementary Figures

**Figure S1.** Polyacrylamide gels showing the effect of Pb<sup>2+</sup> and Ca<sup>2+</sup> on the endonuclease activity of Hpa II at DNA concentrations of (A) 0.15 μM and (B) 0.75 μM.

**Figure S2.** Agarose gel of genomic DNA before and after sonication. Genomic DNA was sheared into fragments of ~ 100-300 bp in length. Lane 1: 1 kbp DNA ladder (NEB). Lane 2 and 3: Genomic DNA before and after sonication. Lane 4: 100 bp DNA ladder (NEB).

**Figure S3.** A typical polyacrylamide gel of DNA fragments digested by *HpaII* after different durations of methyltransferase reactions (0 – 10 mins) catalyzed by *M.SssI* under different Ca concentrations. Presence of Ca does not affect the activity of *M.SssI*. [DNA] = 0.15 μM.

**Figure S4.** Effect of Pb<sup>2+</sup> (100 and 500 ppb) on zebrafish gDNA methylation assessed using a FCS-based assay. \*: p<0.05 (ANOVA, Duncan's multiple-range test); n≥5, n: number of samples. Data is presented as mean ± standard deviation.

## 1. Supplementary Tables

**Table S1.** Sequence of DNA fragment used for the evaluation of the methyltransferase activity of M. Sss I.

| Name            | Sequence                                                                                                                                                                                                      | No. CG sites. |
|-----------------|---------------------------------------------------------------------------------------------------------------------------------------------------------------------------------------------------------------|---------------|
| MMTV<br>(147bp) | ACTTGCAACAGTCCTAACATTCACCTCTTGTGTGTTTGTGTCTGTT <b>CGCCAT</b><br>CCCGTCT <b>CCGCTCGT</b> CACTTATCCTTCACTTCCAGAGGGTCCCC <b>CGCAC</b><br>ACCC <b>CGGCG</b> ACCCTCAGGT <b>CGGCCG</b> ACT <b>GCGGC</b> ACAGTTTTTTG | 10            |

## 2. Supplementary Figures

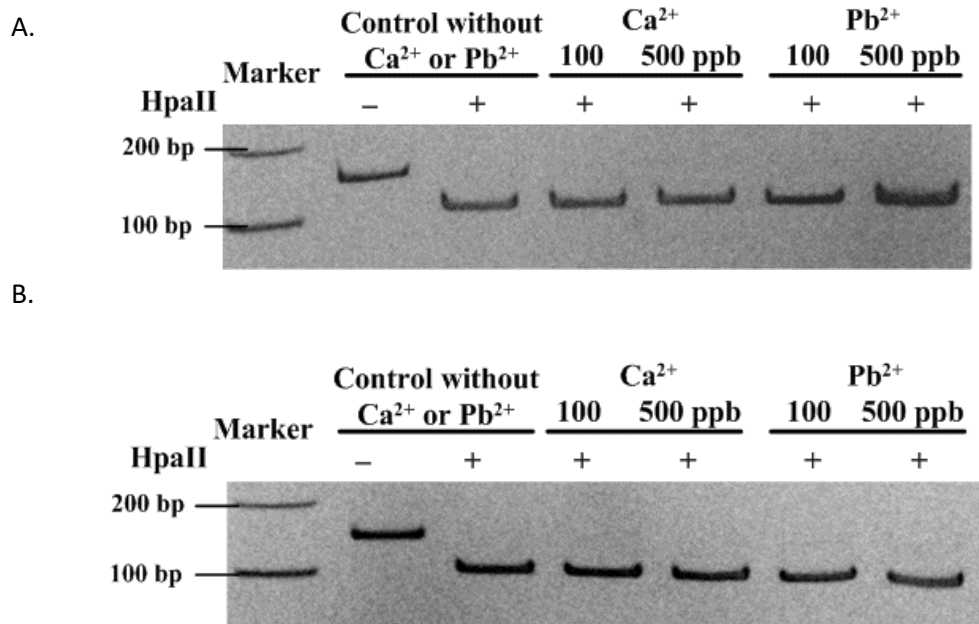

**Figure S1.** Polyacrylamide gels showing the effect of Pb<sup>2+</sup> and Ca<sup>2+</sup> on the endonuclease activity of Hpa II at DNA concentrations of (A) 0.15 μM and (B) 0.75 μM.

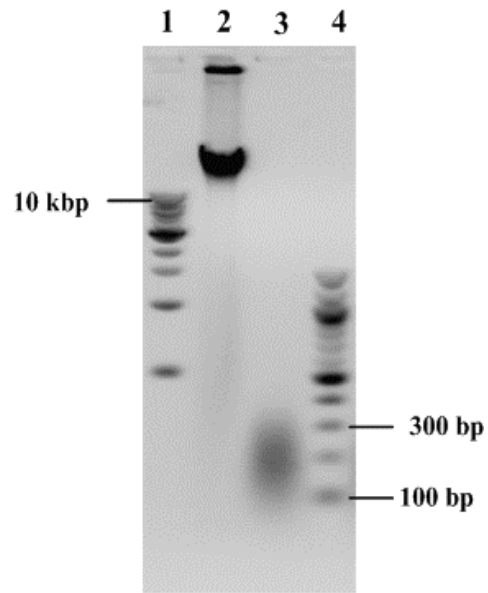

**Figure S2.** Agarose gel of genomic DNA before and after sonication. Genomic DNA was sheared into fragments of ~ 100-300 bp in length. Lane 1: 1 kbp DNA ladder (NEB). Lane 2 and 3: Genomic DNA before and after sonication. Lane 4: 100 bp DNA ladder (NEB).

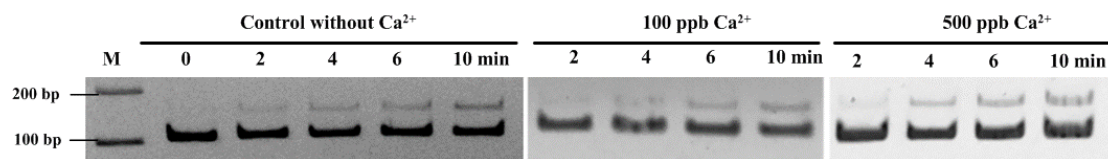

**Figure S3.** Polyacrylamide gel of DNA fragments digested by *HpaII* after different durations of methyltransferase reactions (0 – 10 mins) catalyzed by M.SssI under different Ca concentrations. Presence of Ca does not affect the activity of *M.SssI*.

[DNA] = 0.15 $\mu$ M.

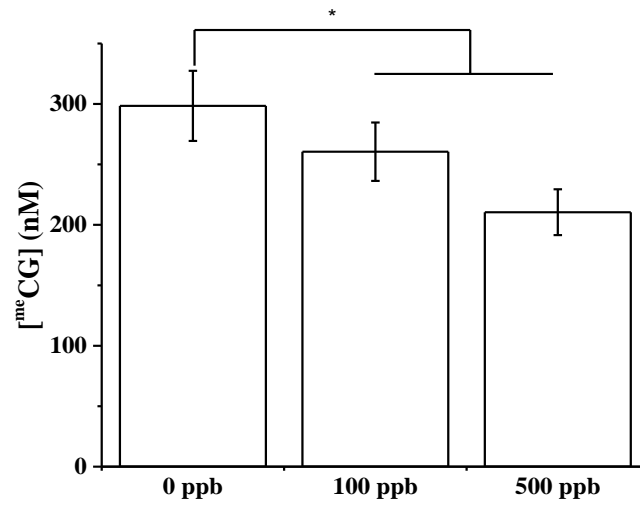

**Figure S4.** Effect of Pb<sup>2+</sup> (100 and 500 ppb) on zebrafish gDNA methylation assessed using a FCS-based assay. \*: p<0.05 (ANOVA, Duncan's multiple-range test); n≥5, n: number of samples. Data is presented as mean ± standard deviation.
